# Supplementary material
Source: PubMed Central journal article supplement (PMC5027174)
Supplement: NIHMS770787-supplement-Appendix.pdf [file NIHMS770787-supplement-Appendix.pdf]

Appendix 1. Table of variables with descriptions

| NHANES variable                                 | Source | Description                                                                                                                                                                                                                                                                                         |
|-------------------------------------------------|--------|-----------------------------------------------------------------------------------------------------------------------------------------------------------------------------------------------------------------------------------------------------------------------------------------------------|
| Seqn                                            |        | Respondent sequence number                                                                                                                                                                                                                                                                          |
| Sdmvpsu                                         |        | Masked Variance Unit Pseudo-PSU variable for variance estimation                                                                                                                                                                                                                                    |
| Sdmvstra                                        |        | Masked Variance Unit Pseudo-Stratum variable for variance estimation                                                                                                                                                                                                                                |
| Wtint2yr                                        |        | Full Sample 2 Year Interview Weight                                                                                                                                                                                                                                                                 |
| Wtmec2yr                                        |        | Full Sample 2 Year MEC Exam Weight                                                                                                                                                                                                                                                                  |
| cLBP (Arq010 arq024d arq024e arq022ad arq022ae) | HHQ    | Arq010 arq024d arq024e arq022ad arq022ae                                                                                                                                                                                                                                                            |
| Ridageyr                                        | HHQ    | Best age in years of the sample person at time of HH screening. Recoded as categorical by decade                                                                                                                                                                                                    |
| Riagendr                                        | HHQ    | Gender of the sample person                                                                                                                                                                                                                                                                         |
| Ridreth1                                        | HHQ    | Recoded for race and ethnicity information                                                                                                                                                                                                                                                          |
| Dmdmartl                                        | HHQ    | Marital Status                                                                                                                                                                                                                                                                                      |
| Dmdeduc2                                        | HHQ    | What is the highest grade or level of school {you have/SP has} completed or the highest degree {you have/s/he has} received?                                                                                                                                                                        |
| Ocd150                                          | HHQ    | Type of work done last week                                                                                                                                                                                                                                                                         |
| Indhhi2                                         | HHQ    | Total household income (reported as a range value in dollars)                                                                                                                                                                                                                                       |
| Inq060                                          | HHQ    | Did {you/you or any family members living here} receive any disability pension [other than Social Security or Railroad Retirement] in {LAST CALENDAR YEAR}?                                                                                                                                         |
| Bmxbmi                                          | MEC    | Body Mass Index (kg/m <sup>2</sup> ). Recoded as categorical according to definitions of normal weight, overweight, obesity                                                                                                                                                                         |
| Smoking status (smq020, smq040)                 | HHQ    | Derived from Smq020 (Smoked at least 100 cigarettes in life) and smq040 (Do you now smoke cigarettes)                                                                                                                                                                                               |
| Alq101                                          | MEC    | Had at least 12 alcohol drinks/1 yr?                                                                                                                                                                                                                                                                |
| Modified AUDIT-C (alq120, alq130, alq140)       | MEC    | Calculated from alq120 (How often drink alcohol over past 12 mos), alq130 (Avg # alcoholic drinks/day -past 12 mos), alq140 (#days have 5 or more drinks/past 12 mos)                                                                                                                               |
| Slq050                                          | HHQ    | {Have you/Has SP} ever told a doctor or other health professional that {you have/s/he has} trouble sleeping?                                                                                                                                                                                        |
| PHQ9 score                                      | MEC    | Calculated as a sum of answers to the DPQ questionnaire                                                                                                                                                                                                                                             |
| Number of medical comorbidities                 | HHQ    | Sum of comorbidities listed in the Medical Comorbidity Questionnaire (mcq035,mcq053 mcq070 mcq082 mcq160a mcq191 mcq160n mcq160b mcq160f, mcq160g, mcq160k mcq160l, mcq160m, mcq220; mcq160c or mcq160d or mcq160e), diabetes questionnaire (diq010), kidney disease questionnaire (kiq026, kiq022) |
| Hiq011                                          | HHQ    | {Are you/Is SP} covered by health insurance or some other kind of health care plan? [Include health insurance obtained through employment or purchased directly as well as government programs like Medicare and Medicaid that provide medical care or help pay medical bills.]                     |
| Health insurance type                           | HHQ    | Covered by private insurance/ Covered by Medicare/ Covered by                                                                                                                                                                                                                                       |

|             |     |                                                                                                                                                                                                                                                                                                      |
|-------------|-----|------------------------------------------------------------------------------------------------------------------------------------------------------------------------------------------------------------------------------------------------------------------------------------------------------|
| (hiq031a-i) |     | Medi-Gap/ Covered by Medicaid/ Covered by SCHIP*/ Covered by military health care*/ Covered by Indian Health Service*/ Covered by state-sponsored health plan/ Covered by other government insurance.<br>*Recoded as "Other government insurance"                                                    |
| Huq050      | HHQ | {During the past 12 months, how/How} many times {have you/has SP} seen a doctor or other health care professional about {your/his/her} health at a doctor's office, a clinic, hospital emergency room, at home or some other place? Do not include times {you were/s/he was} hospitalized overnight. |
| Huq071      | HHQ | {During the past 12 months, were you/{Was/was} SP} a patient in a hospital overnight? Do not include an overnight stay in the emergency room.                                                                                                                                                        |

Legend: HHQ – household questionnaire MEC – mobile examination center. SP – sample person.

Appendix 2. Factors associated with  $\geq 10$  healthcare visits in the past year in US adults with chronic low back pain (N = 700), full version.

|                               | $\geq 10$ visits/year %<br>N = 172 | $< 10$ visits/year %<br>N = 528 | Chi-Sq<br>P-value | Adjusted OR      | AOR<br>P-value |
|-------------------------------|------------------------------------|---------------------------------|-------------------|------------------|----------------|
| <b>Age</b>                    |                                    |                                 |                   |                  |                |
| 20-29                         | 10.2 (3.4)                         | 16.7 (1.3)                      | 0.070             | 1 (Ref.)         | 0.0062         |
| 30-39                         | 12.5 (3.3)                         | 20.1 (3.1)                      |                   | 0.97 (0.31-3.00) |                |
| 40-49                         | 26.7 (4.5)                         | 17.0 (2.0)                      |                   | 2.09 (0.92-4.74) |                |
| 50-59                         | 28.8 (5.1)                         | 26.8 (2.9)                      |                   | 1.11 (0.44-2.83) |                |
| 60-69                         | 21.7 (3.2)                         | 19.5 (1.4)                      |                   | 0.97 (0.41-2.27) |                |
| <b>Female gender</b>          | 60.8 (6.0)                         | 54.4 (2.8)                      | 0.341             | 1.15 (0.66-2.00) | 0.612          |
| <b>Race</b>                   |                                    |                                 |                   |                  |                |
| African American              | 9.9 (1.8)                          | 10.0 (1.5)                      | 0.015             | 1 (Ref.)         | 0.0076         |
| Caucasian                     | 80.2 (4.1)                         | 73.3 (3.9)                      |                   | 1.21 (0.77-1.90) |                |
| Hispanic                      | 9.1 (3.4)                          | 12.9 (3.2)                      |                   | 0.93 (0.41-2.14) |                |
| Other                         | 0.8 (0.5)                          | 3.9 (0.9)                       |                   | 0.26 (0.10-0.66) |                |
| <b>Education</b>              |                                    |                                 |                   |                  |                |
| College and higher            | 20.3 (4.1)                         | 18.1 (2.8)                      | 0.816             | 1 (Ref.)         | 0.235          |
| GED/AA degree                 | 60.9 (4.4)                         | 61.0 (2.3)                      |                   | 0.78 (0.49-1.25) |                |
| Less than High school         | 18.8 (3.1)                         | 21.0 (2.1)                      |                   | 0.59 (0.32-1.09) |                |
| <b>Marital status</b>         |                                    |                                 |                   |                  |                |
| Married/living w partner      | 59.3 (5.2)                         | 64.1 (2.3)                      | 0.352             | 1 (Ref.)         | 0.416          |
| Separated                     | 25.8 (5.6)                         | 18.9 (1.9)                      |                   | 1.33 (0.82-2.14) |                |
| Never married                 | 15.0 (3.8)                         | 17.0 (2.5)                      |                   | 1.24 (0.66-2.31) |                |
| <b>Employment status</b>      |                                    |                                 |                   |                  |                |
| Working                       | 37.3 (5.9)                         | 62.3 (2.1)                      | 0.0004            | 1 (Ref.)         | 0.0013         |
| Not working                   | 59.7 (5.6)                         | 34.7 (2.2)                      |                   | 3.00 (1.64-5.46) |                |
| Looking for work              | 3.0 (1.8)                          | 3.1 (0.8)                       |                   | 1.82 (0.37-8.96) |                |
| <b>Annual HH income \$</b>    |                                    |                                 |                   |                  |                |
| >100 000                      | 12.4 (3.8)                         | 19.0 (1.9)                      | 0.477             | 1 (Ref.)         | 0.119          |
| 65-99 000                     | 18.9 (4.5)                         | 16.1 (2.0)                      |                   | 1.81 (0.68-4.81) |                |
| 45-64 000                     | 15.4 (4.8)                         | 16.5 (2.2)                      |                   | 1.79 (0.64-5.01) |                |
| 20-44 000                     | 28.1 (3.8)                         | 29.3 (1.8)                      |                   | 1.64 (0.74-3.66) |                |
| <20 000                       | 25.3 (6.1)                         | 19.1 (2.2)                      |                   | 2.09 (1.11-3.95) |                |
| <b>Income from disability</b> | 24.9 (6.6)                         | 8.9 (1.6)                       | 0.0006            | 2.58 (1.41-4.73) | 0.0021         |
| <b>BMI</b>                    |                                    |                                 |                   |                  |                |
| <25                           | 16.3 (3.9)                         | 27.7 (2.5)                      | 0.031             | 1 (Ref.)         | 0.255          |
| 25-30                         | 31.8 (4.3)                         | 30.5 (2.5)                      |                   | 1.81 (0.87-3.74) |                |
| >30                           | 52.0 (3.4)                         | 41.9 (3.1)                      |                   | 1.57 (0.86-2.86) |                |
| <b>Smoking status</b>         |                                    |                                 |                   |                  |                |
| Never                         | 35.7 (4.1)                         | 44.7 (2.7)                      | 0.037             | 1 (Ref.)         | 0.075          |

|                                |            |            |         |                   |         |
|--------------------------------|------------|------------|---------|-------------------|---------|
| Former                         | 34.1 (3.4) | 24.9 (1.9) |         | 1.62 (1.03-2.52)  |         |
| Current                        | 30.3 (3.6) | 30.4 (2.7) |         | 1.12 (0.61-2.06)  |         |
| <b>Alcohol use, past year</b>  | 74.4 (5.5) | 74.5 (2.7) | 0.939   | 0.93 (0.40-2.19)  | 0.873   |
| <b>Modified AUDIT-C ≥4</b>     | 14.1 (4.4) | 22.2 (1.5) | 0.141   | 0.62 (0.34-1.16)  | 0.135   |
| <b>PHQ9 score (depression)</b> |            |            |         |                   |         |
| 1-4 (none)                     | 38.3 (5.3) | 62.4 (3.1) | <0.0001 | 1 (Ref.)          | <0.0001 |
| 5-9 (mild)                     | 20.0 (3.1) | 21.7 (2.8) |         | 1.74 (0.82-3.65)  |         |
| 10-14 (moderate)               | 14.9 (3.7) | 8.6 (0.9)  |         | 2.63 (1.19-5.86)  |         |
| 15-19 (mod-sev)                | 18.9 (6.0) | 5.5 (0.9)  |         | 5.09 (2.58-10.03) |         |
| 20-27 (severe)                 | 7.9 (3.3)  | 1.7 (0.4)  |         | 5.55 (1.27-24.18) |         |
| <b>Sleep disturbances</b>      | 72.0 (4.7) | 46.6 (2.7) | <0.0001 | 2.29 (1.57-3.33)  | <0.0001 |
| <b>Medical comorbidities</b>   |            |            |         |                   |         |
| 0-1                            | 39.7 (6.0) | 63.6 (2.9) | <0.0001 | 1 (Ref.)          | <0.0001 |
| 2-3                            | 30.8 (4.8) | 26.4 (1.9) |         | 1.84 (0.95-3.56)  |         |
| >3                             | 29.5 (4.7) | 10.0 (1.8) |         | 5.00 (2.44-10.26) |         |

Legend: Unadjusted estimates given with standard error, adjusted odds ratios – with 95% confidence intervals; Chi-Sq – Chi-Square. AOR – adjusted odds ratio, adjusted for age, race, gender, education, number of medical comorbidities. GED – general educational development. AA – associate’s. HH – household. BMI – body mass index. PHQ9 – patient health questionnaire 9. Reference category not displayed for binary variables.
